# Supplementary material for: Relationship of Personality Disorders to the Course of Major Depressive Disorder in a Nationally Representative Sample
Source: Atypon-hosted journal article supplement (doi:10.1176/appi.ajp.2010.10050695), 2011-01-18
Supplement: ajp_168_03_257_01.pdf [file ajp_168_03_257_01.pdf]

**Online Table 1. SF-12v2<sup>a</sup> Mental Component Scores (MCS) at Wave 1 and Wave 2, by Personality Disorder (N=1,995)<sup>b</sup>**

| Personality Disorder (PD)           | Wave 1 SF-12 |      | Wave 2 SF-12 |      |
|-------------------------------------|--------------|------|--------------|------|
|                                     | Mean         | S.E. | Mean         | S.E. |
| No personality disorder (reference) | 44.87        | 0.4  | 47.40        | 0.4  |
| Antisocial                          | 38.70        | 3.5  | 31.27*       | 5.0  |
| Avoidant                            | 35.84*       | 1.0  | 39.94*       | 1.1  |
| Borderline                          | 37.58*       | 0.8  | 36.68*       | 0.9  |
| Dependent                           | 31.01*       | 1.6  | 35.29*       | 2.4  |
| Histrionic                          | 39.04*       | 1.4  | 41.06*       | 1.4  |
| Narcissistic                        | 41.27*       | 1.0  | 41.31*       | 1.0  |
| OCD                                 | 39.57*       | 0.8  | 43.77*       | 0.9  |
| Paranoid                            | 37.74*       | 1.0  | 41.47*       | 1.0  |
| Schizoid                            | 36.02*       | 1.3  | 39.59*       | 1.6  |
| Schizotypal                         | 37.92*       | 1.2  | 38.24*       | 1.1  |

<sup>a</sup> All standardized scale scores range from 0-100, with a mean of 50 (SD=10); higher scores signify better functioning.

<sup>b</sup> Weighted linear regression analysis comparing mean SF12v2 scores between respondents with each PD compared to those never diagnosed with PD controlling for age, sex, race/ethnicity.

\* p<0.0001

**Online Table 2. Life Events Suggesting Impaired Functioning: Association with Personality Disorders at Wave 1 and Wave 2 (N=1,996)<sup>a</sup>**

|                   | Relationship Broke Up |                   |               |                  | Problems with Friends |                   |               |                  | Trouble with Boss  |                   |                |                   |
|-------------------|-----------------------|-------------------|---------------|------------------|-----------------------|-------------------|---------------|------------------|--------------------|-------------------|----------------|-------------------|
|                   | Wave 1                |                   | Wave 2        |                  | Wave 1                |                   | Wave 2        |                  | Wave 1             |                   | Wave 2         |                   |
|                   | OR                    | 95% CI            | OR            | 95% CI           | OR                    | 95% CI            | OR            | 95% CI           | OR                 | 95% CI            | OR             | 95% CI            |
| No PD (reference) | 1.00                  | 1.00-1.00         | 1.00          | 1.00-1.00        | 1.00                  | 1.00-1.00         | 1.00          | 1.00-1.00        | 1.00               | 1.00-1.00         | 1.00           | 1.00-1.00         |
| ASP               | 3.05                  | 0.75-12.39        | 1.62          | 0.49-5.36        | <b>7.98**</b>         | <b>2.32-27.43</b> | 0.92          | 0.23-3.61        | <b>3.38*</b>       | <b>1.12-10.17</b> | 1.30           | 0.46-3.65         |
| Avoidant          | 0.96                  | 0.58-1.64         | 1.27          | 0.66-2.43        | <b>3.25**</b>         | <b>1.99-5.32</b>  | <b>2.52**</b> | <b>1.45-4.40</b> | <b>2.06**</b>      | <b>1.32-3.23</b>  | <b>1.81*</b>   | <b>1.08-3.04</b>  |
| Borderline        | 1.36                  | 0.92-2.01         | <b>2.04**</b> | <b>1.29-3.23</b> | <b>2.34**</b>         | <b>1.58-3.46</b>  | <b>3.49**</b> | <b>2.29-5.32</b> | <b>1.75**</b>      | <b>1.21-2.54</b>  | <b>2.31**</b>  | <b>1.57-3.42</b>  |
| Dependent         | 0.94                  | 0.33-2.72         | 1.58          | 0.30-8.34        | <b>4.08**</b>         | <b>1.50-11.07</b> | 1.47          | 0.43-5.02        | 1.23               | 0.44-3.46         | 1.88           | 0.70-5.05         |
| Histrionic        | 1.42                  | 0.76-2.66         | 1.47          | 0.66-3.28        | <b>4.73**</b>         | <b>2.47-9.04</b>  | <b>4.78**</b> | <b>2.58-8.87</b> | <b>2.50**</b>      | <b>1.48-4.21</b>  | <b>1.89*</b>   | <b>1.06-3.34</b>  |
| Narcissistic      | 0.77                  | 0.48-1.24         | 1.46          | 0.83-2.56        | <b>3.02**</b>         | <b>1.90-4.79</b>  | <b>3.31**</b> | <b>2.02-5.44</b> | <b>2.21**</b>      | <b>1.42-3.44</b>  | <b>2.32**</b>  | <b>1.48-3.62</b>  |
| OCD               | 0.82                  | 0.54-1.24         | 1.61          | 0.97-2.67        | <b>2.57**</b>         | <b>1.75-3.79</b>  | <b>2.47**</b> | <b>1.57-3.89</b> | <b>2.43**</b>      | <b>1.68-3.52</b>  | <b>1.72*</b>   | <b>1.12-2.65</b>  |
| Paranoid          | 1.39                  | 0.92-2.11         | 1.39          | 0.83-2.33        | <b>3.66**</b>         | <b>2.48-5.41</b>  | <b>3.73**</b> | <b>2.31-6.02</b> | <b>2.65**</b>      | <b>1.80-3.90</b>  | 1.51           | 0.96-2.37         |
| Schizoid          | 1.17                  | 0.70-1.95         | 1.62          | 0.79-3.32        | <b>2.63**</b>         | <b>1.63-4.24</b>  | <b>2.41**</b> | <b>1.39-4.19</b> | <b>1.90*</b>       | <b>1.15-3.13</b>  | <b>2.10*</b>   | <b>1.19-3.68</b>  |
| Schizotypal       | 1.31                  | 0.79-2.17         | 1.83          | 0.96-3.50        | <b>2.87**</b>         | <b>1.71-4.81</b>  | <b>3.88**</b> | <b>2.25-6.68</b> | 1.48               | 0.93-2.36         | 3.34           | 2.02-5.52         |
|                   | Fired/Laid Off        |                   |               |                  | Unemployed/Looking    |                   |               |                  | Financial Problems |                   |                |                   |
|                   | Wave 1                |                   | Wave 2        |                  | Wave 1                |                   | Wave 2        |                  | Wave 1             |                   | Wave 2         |                   |
|                   | OR                    | 95% CI            | OR            | 95% CI           | OR                    | 95% CI            | OR            | 95% CI           | OR                 | 95% CI            | OR             | 95% CI            |
| No PD (reference) | 1.00                  | 1.00-1.00         | 1.00          | 1.00-1.00        | 1.00                  | 1.00-1.00         | 1.00          | 1.00-1.00        | 1.00               | 1.00-1.00         | 1.00           | 1.00-1.00         |
| ASP               | <b>4.68*</b>          | <b>1.21-18.12</b> | 4.56          | 0.93-22.30       | <b>6.53*</b>          | <b>1.07-39.81</b> | 2.88          | 0.84-9.87        | <b>6.84**</b>      | <b>1.81-25.83</b> | <b>12.05**</b> | <b>4.07-35.70</b> |
| Avoidant          | 1.44                  | 0.79-2.64         | 1.04          | 0.50-2.19        | 0.78                  | 0.45-1.36         | 1.15          | 0.65-2.03        | 1.42               | 0.91-2.21         | <b>1.51</b>    | 0.95-2.39         |
| Borderline        | 1.47                  | 0.88-2.46         | 1.97          | 1.10-3.53        | 1.43                  | 0.89-2.29         | <b>1.68*</b>  | <b>1.07-2.64</b> | <b>1.90**</b>      | <b>1.32-2.73</b>  | <b>3.19**</b>  | <b>2.28-4.48</b>  |
| Dependent         | 1.08                  | 0.34-3.36         | 0.66          | 0.18-2.37        | 1.29                  | 0.51-3.27         | 0.57          | 0.18-1.74        | 1.90               | 0.75-4.81         | <b>1.92</b>    | 0.83-4.47         |
| Histrionic        | <b>2.17*</b>          | <b>1.01-4.71</b>  | 1.18          | 0.42-3.27        | 1.15                  | 0.54-2.47         | 1.33          | 0.64-2.77        | <b>1.93*</b>       | <b>1.12-3.32</b>  | <b>2.00*</b>   | <b>1.19-3.36</b>  |
| Narcissistic      | 1.23                  | 0.71-2.14         | 1.09          | 0.59-2.01        | 1.01                  | 0.60-1.70         | 0.90          | 0.51-1.57        | 1.38               | 0.90-2.11         | <b>1.52</b>    | 0.98-2.37         |
| OCD               | 1.65                  | 0.99-2.73         | 1.25          | 0.64-2.44        | 1.22                  | 0.76-1.96         | 1.42          | 0.88-2.30        | <b>1.57*</b>       | <b>1.11-2.22</b>  | <b>2.13**</b>  | <b>1.49-3.05</b>  |
| Paranoid          | <b>1.84*</b>          | <b>1.16-2.93</b>  | 1.32          | 0.69-2.51        | 1.31                  | 0.81-2.10         | 1.04          | 0.65-1.68        | <b>1.75**</b>      | <b>1.23-2.49</b>  | <b>2.50**</b>  | <b>1.71-3.65</b>  |
| Schizoid          | 1.82                  | 0.91-3.62         | 1.86          | 0.84-4.13        | 1.18                  | 0.60-2.31         | <b>1.86*</b>  | <b>1.04-3.33</b> | <b>1.79*</b>       | <b>1.13-2.82</b>  | <b>2.56**</b>  | <b>1.55-4.24</b>  |
| Schizotypal       | 1.44                  | 0.74-2.79         | 2.09          | 0.99-4.43        | 1.26                  | 0.66-2.40         | 1.55          | 0.83-2.91        | <b>1.84*</b>       | <b>1.12-3.02</b>  | <b>3.81**</b>  | <b>2.38-6.10</b>  |

<sup>a</sup> Weighted logistic regression analyses comparing occurrence of stressful life events between respondents with each personality disorder compared to those never diagnosed with a personality disorder, controlling for age, sex, and race/ethnicity.

\* p<0.05

\*\* p<0.01
